# Supplementary material
Source: PubMed Central journal article supplement (PMC6644787)
Supplement: ao8b01977_si_001.pdf [file ao8b01977_si_001.pdf]

## SUPPORTING INFORMATION

### Reductive cleavage of organic peroxides by iron salts and thiols

(10 pages)

Andrew S. Olson,<sup>†</sup> Abigail J. Jameson,<sup>†</sup> Shiva K. Kyasa,<sup>‡</sup> Boone W. Evans,<sup>†</sup> and Patrick H. Dussault<sup>\*†</sup>

<sup>†</sup>University of Nebraska-Lincoln, Department of Chemistry, 809 Hamilton Hall, Lincoln, NE 68588-0304

<sup>‡</sup>Western New Mexico University, Department of Natural Sciences, Silver City, NM 88062

\*e-mail: pdussault1@unl.edu

**Figure S-1.** Visible monitoring of Fe/RSH promoted reduction (time lapse)

**Figure S-2.** <sup>1</sup>H NMR monitoring of the disproportionation of diacetone diperoxide (**6**) and the reductive decomposition of dialkyl peroxide (**3**).

**Figure S-3.** <sup>1</sup>H and <sup>13</sup>C NMR spectra related to synthesis of alkoxy radical probe **8**.

**Figure S-4.** <sup>1</sup>H NMR of reaction mixture from reaction of probe **8**.

**Figure S-5.** <sup>1</sup>H NMR spectra of purified reaction mixtures from reduction of peroxides **1-4**.

**Figure S-1.** Visual monitoring of Fe/thiol promoted reduction

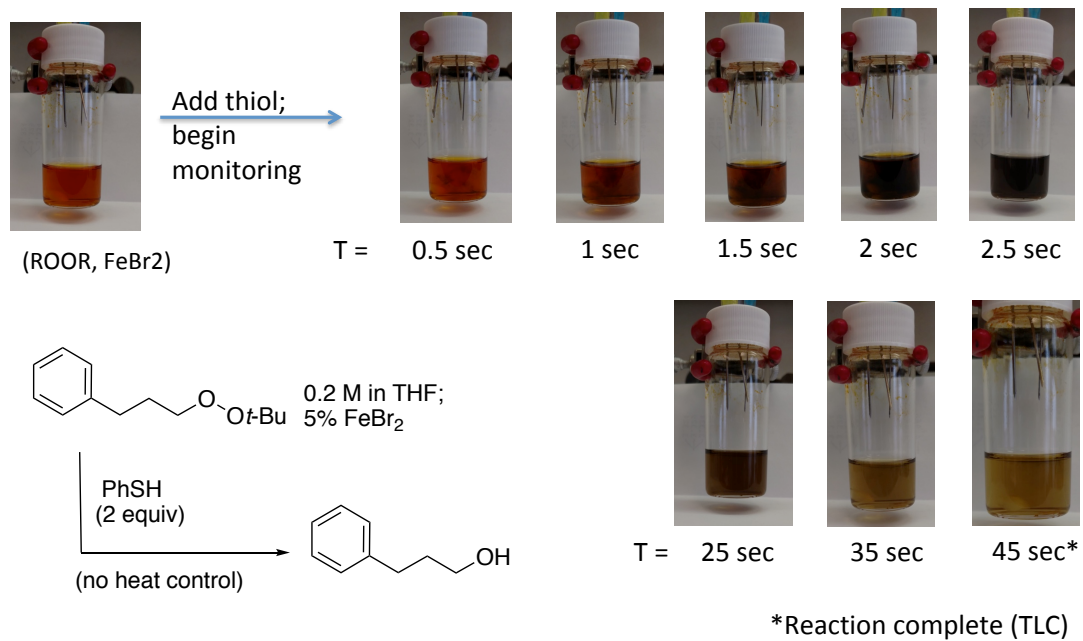

**Figure S-2**

**a.**  $^1\text{H}$  NMR monitoring of the  $\text{FeBr}_2/\text{PhSH}$ -promoted decomposition of diacetone diperoxide (**6**)

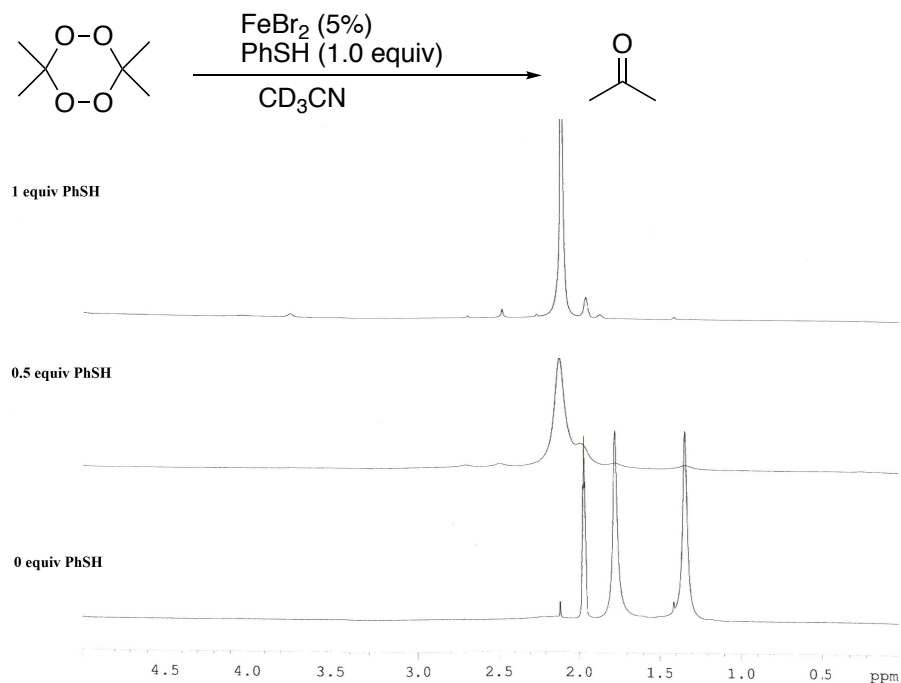

**b.**  $^1\text{H}$  NMR monitoring of reduction of dialkyl peroxide **3** by  $\text{Fe}(\text{SPh})_n/\text{stoichiometric PhSH}$ .

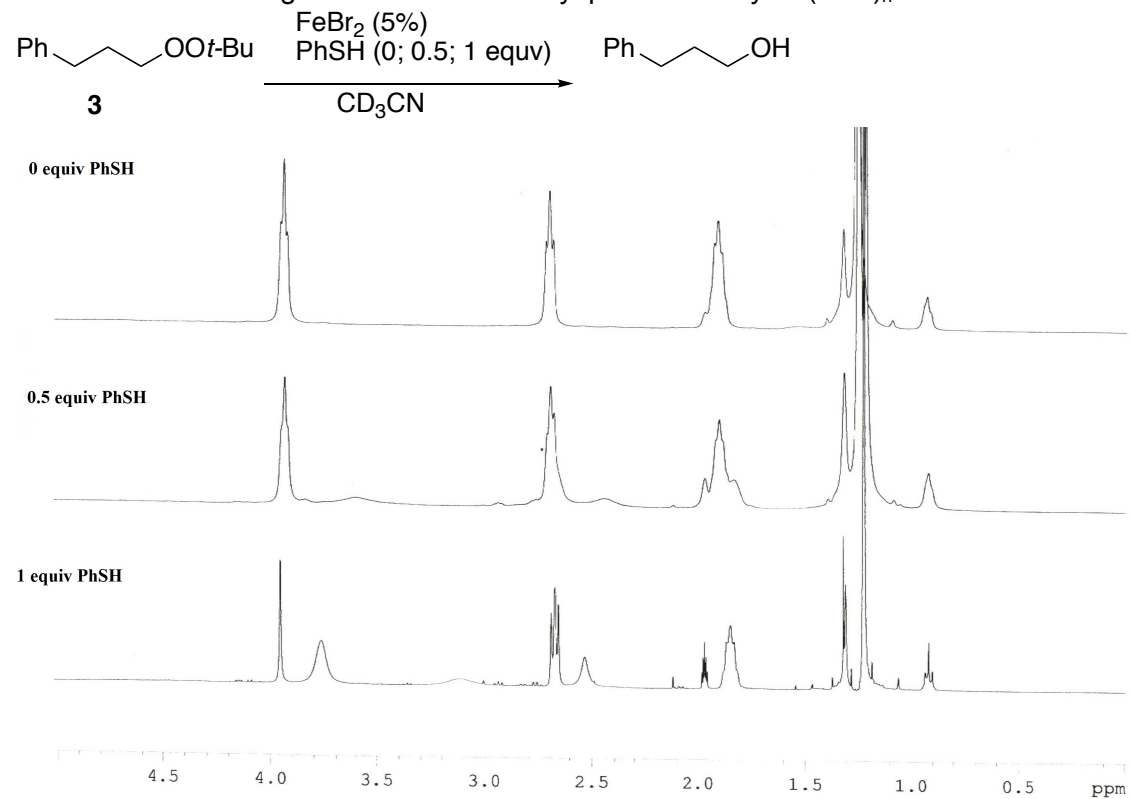

**Figure S-3.** NMR spectra related to synthesis of probe **8**  
**a.**  $^1\text{H}$  NMR of 1-phenyl-2-methyl-2-propyl hydroperoxide

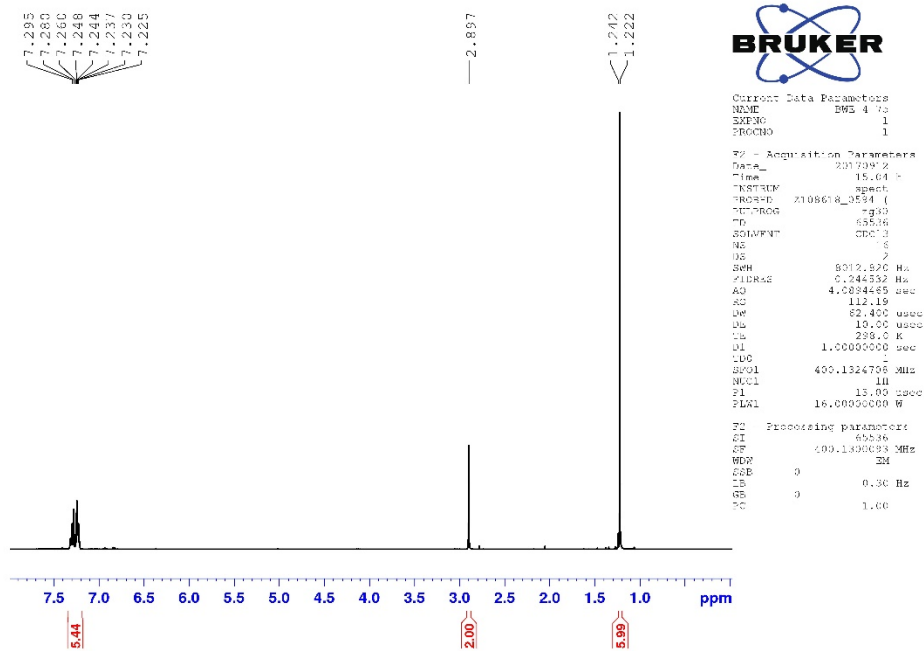

**b.**  $^{13}\text{C}$  NMR of 1-phenyl-2-methyl-2-propyl hydroperoxide

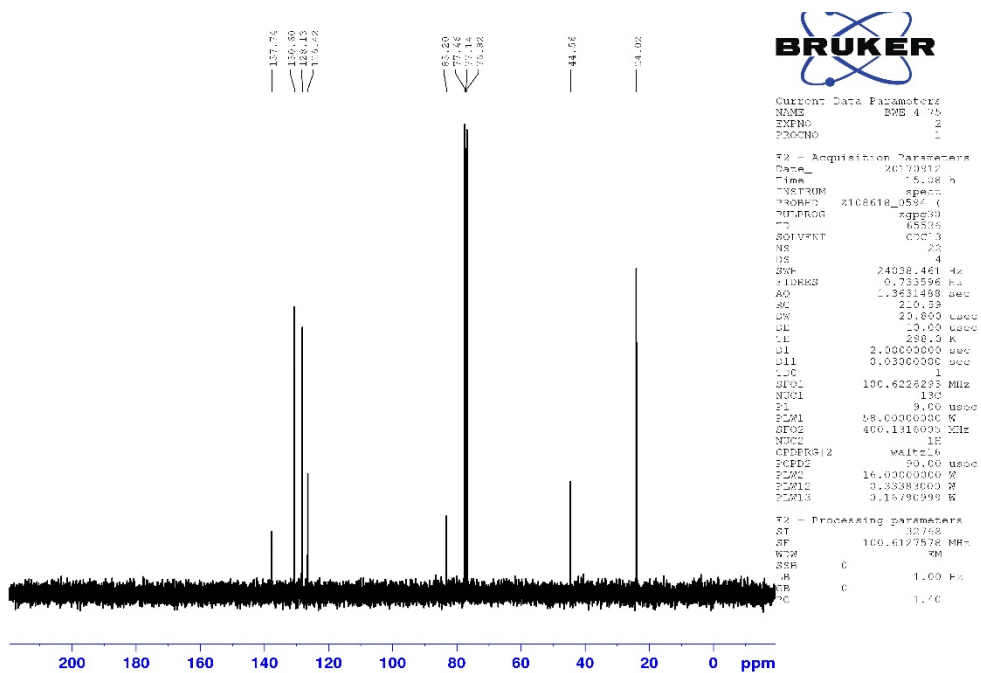

c.  $^1\text{H}$  NMR of Methyl 1-phenyl-2-methyl-2-propyl peroxide (**8**)

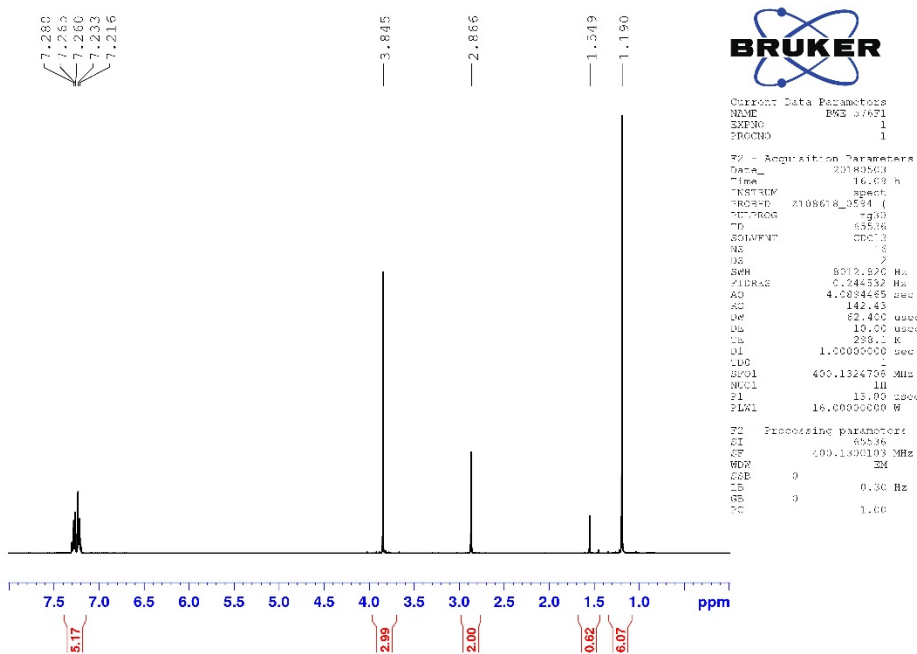

d.  $^{13}\text{C}$  NMR of Methyl 1-phenyl-2-methyl-2-propyl peroxide (**8**)

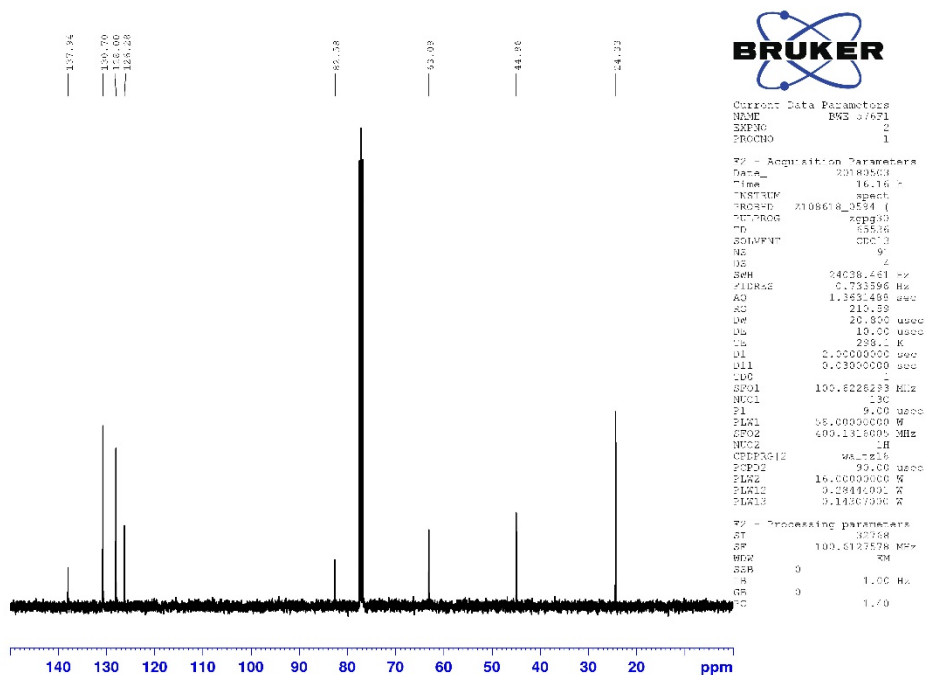

**Figure S-4.**  $^1\text{H}$  NMR analysis of reductive fragmentation of radical probe **8**. (Relative yields shown; isolated yield of 2-methyl-1-phenyl-2-propanol in parentheses).

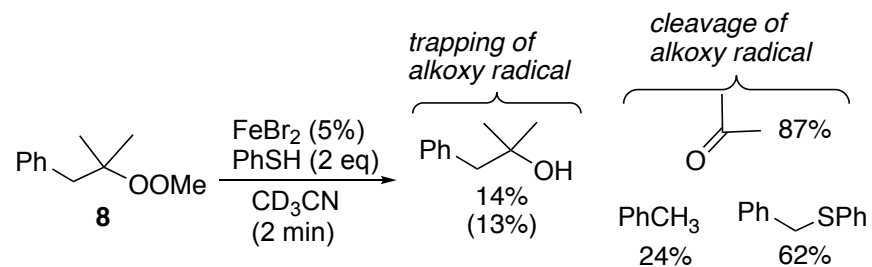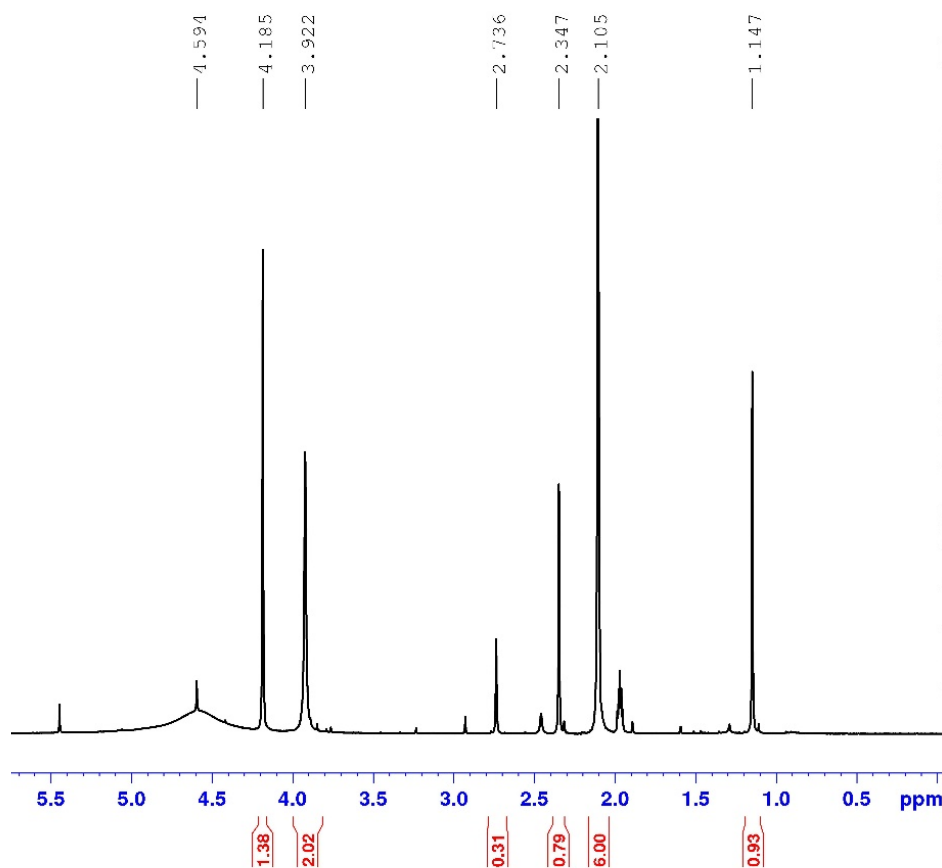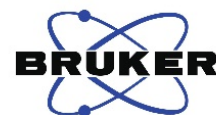

```

Current Data Parameters
NAME      ACC966
EXPNO    1
PROCNO   1

F2 - Acquisition Parameters
Date_    20180725
Time     13.06 h
INSTRUM spect
PROBHD   Z104275_0302 (
PULPROG zg30
TD       65536
SOLVENT  CD3CN
NS       16
DS       2
SRH      6009.615 Hz
FIDRES   0.183399 Hz
AQ       5.4525952 sec
RG       63.94
DW       83.200 usec
DE       6.50 usec
TE       298.0 K
D1       1.00000000 sec
TD0      1
SFO1     300.1318534 MHz
NUC1     1H
P0       3.17 usec
P1       9.50 usec
PL1      14.99699974 W

F2 - Processing parameters
SI       65536
SF       300.1300000 MHz
WDW      EM
SSB      0
LB       0.30 Hz
GB       0
CB
PC       1.00
    
```

**Figure S-5.** <sup>1</sup>H NMR spectra of purified reaction mixtures from reduction (5% FeBr<sub>2</sub>, 1.0 equiv PhSH) of peroxides: a) **1**; b. **2**; c. **3**; d. **4**.

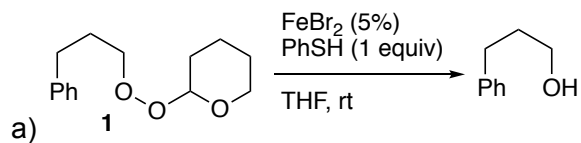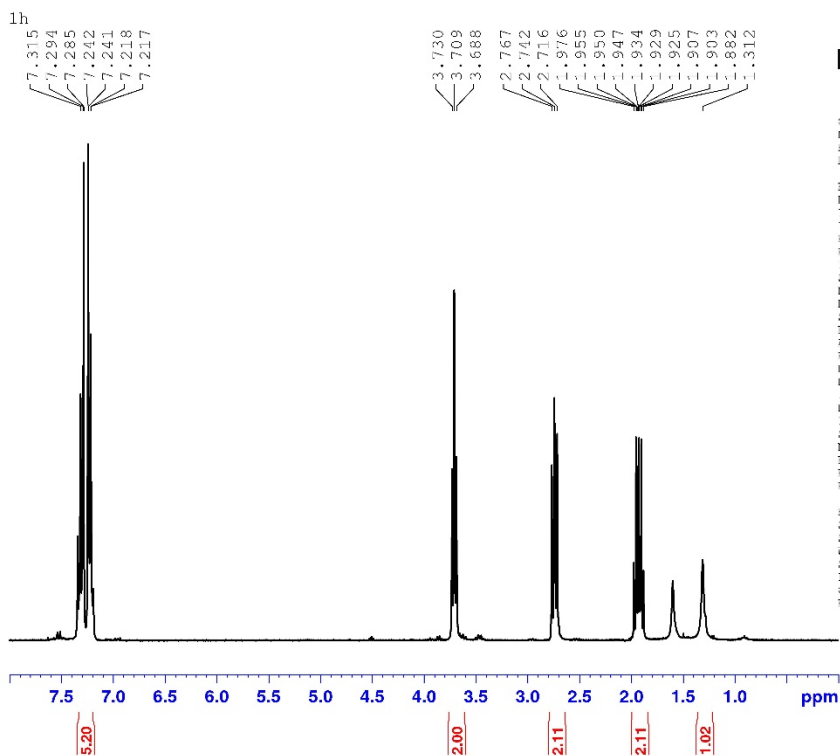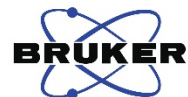

Current Data Parameters  
 NAME A00935  
 EXPNO 1  
 PROCNO 1

F2 - Acquisition Parameters  
 Date\_ 20190829  
 Time 14.51 h  
 INSTRM spect  
 PROBEID z104275\_0302 ( )  
 PULPROG zg30  
 LE 65536  
 SOLVENT CDCl3  
 NS 16  
 DS 2  
 SWH 6099.615 Hz  
 FIDRES 0.183399 Hz  
 AQ 5.4523952 sec  
 RG 256  
 BK 83.200 usec  
 LK 6.50 usec  
 LE 298.0 K  
 EC 1.00000000 sec  
 ZD0 1  
 SFO1 300.1318534 MHz  
 NUC1 1H  
 P0 3.17 usec  
 P1 9.50 usec  
 PLW1 14.99699974 W

F2 - Processing parameters  
 LE 65536  
 SF 300.1300000 MHz  
 NMR EM  
 SSB 0  
 LB 0.30 Hz  
 GB 0  
 PC 1.00

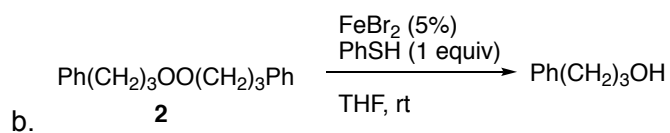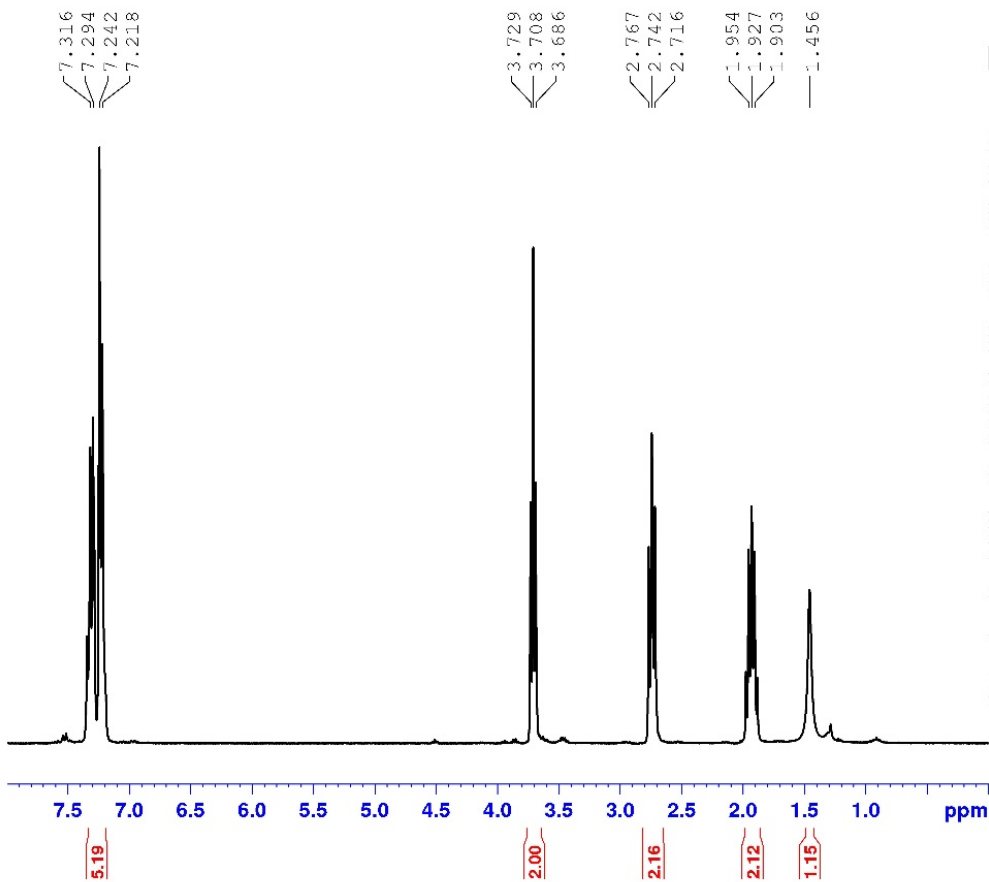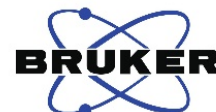

Current Data Parameters  
 NAME A00937 repeat AMR  
 EXPNO 1  
 PROCNO 1

F2 - Acquisition Parameters  
 Date\_ 20180827  
 Time 9.05 h  
 INSTRUM spect  
 PROBP0 2104275\_0302 ( )  
 PULPROG zg30  
 IL 65536  
 SOLVENT CDCl3  
 NS 16  
 DS 2  
 SRH 6009.615 Hz  
 TDRS 0.183399 Hz  
 AQ 5.4525952 sec  
 RG 208.64  
 DW 83.200 usec  
 DE 6.50 usec  
 JE 298.0 K  
 DL 1.00000000 sec  
 LDO 1  
 SFOL 300.1318534 MHz  
 NUC1 1H  
 P0 3.17 usec  
 P1 9.50 usec  
 P1M1 14.99699974 W

F2 - Processing parameters  
 SI 65536  
 SF 300.1300000 MHz  
 WDW EM  
 SSB 0  
 LB 0.30 Hz  
 CB 0  
 PC 1.00



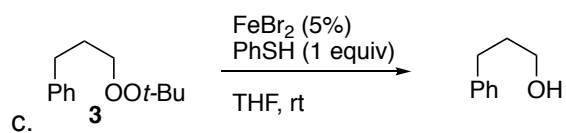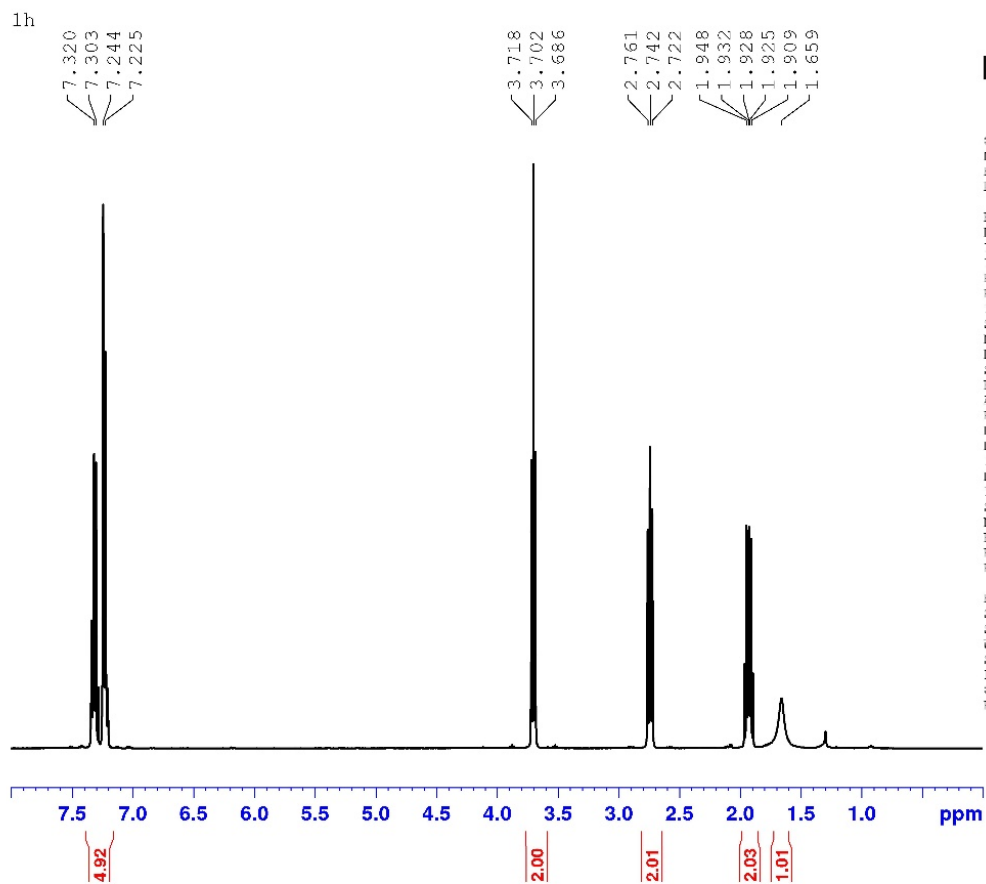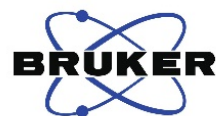

Current Data Parameters  
 NAME A00930 fraction 3  
 EXPNO 1  
 PROCNO 1

F2 - Acquisition Parameters  
 Date\_ 20180517  
 Time 9.47 h  
 INSTRUM spect  
 PROBRD z108618\_0554 (   
 PUIPROG zg30  
 ID 65536  
 SOLVENT CDCl3  
 NS 16  
 DS 2  
 SWH 8912.820 Hz  
 FIDRES 0.244532 Hz  
 AQ 4.0894463 sec  
 RG 62.78  
 DW 62.400 usec  
 DE 10.00 usec  
 TE 298.1 K  
 DC 1.00000000 sec  
 CDO 1  
 SFO1 400.1324038 MHz  
 NUC1 1H  
 P0 4.33 usec  
 P1 13.00 usec  
 PLW1 16.00000000 W

F2 - Processing parameters  
 SI 65536  
 SF 400.1300000 MHz  
 KDW EM  
 SSB 0  
 LB 0.30 Hz  
 GB 0  
 PC 1.00

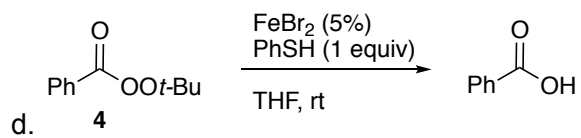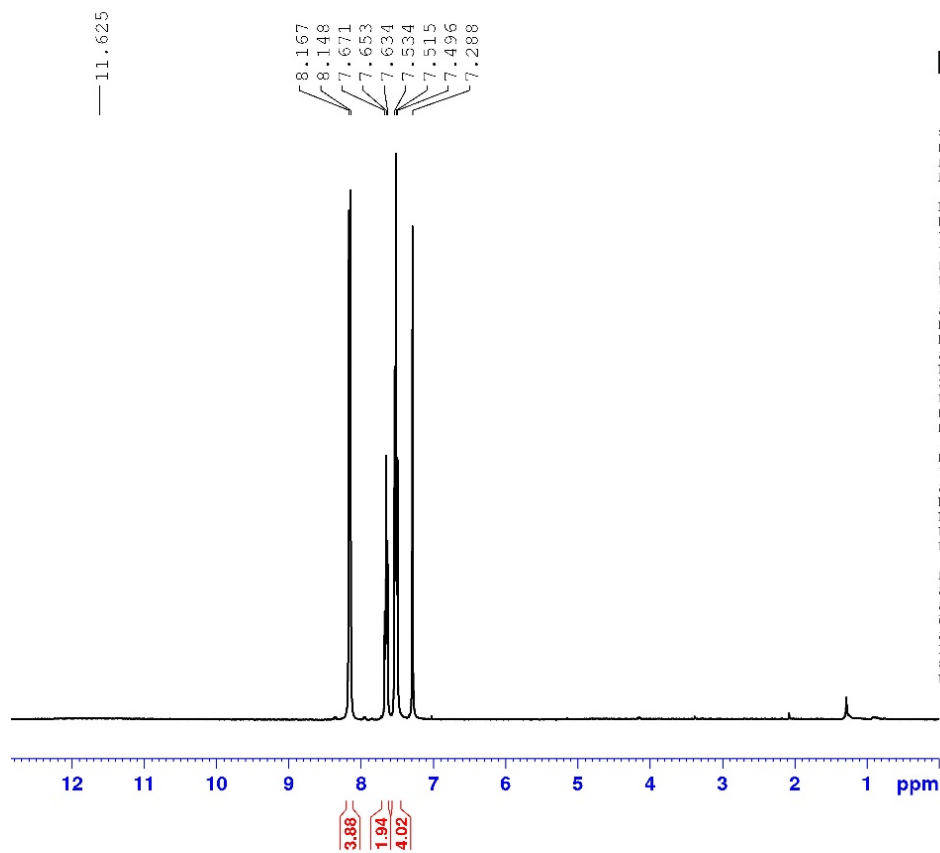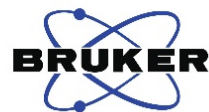

```

Current Data Parameters
NAME      A00998
EXPNO     1
PROCNO    1

F2 - Acquisition Parameters
Date_     20180605
Time      8.42 h
INSTRUM   spect
PROBHD    Z108658_0594 (
PULPROG   zg30
NUC1      65536
SOLVENT   CDCl3
NS        16
DS        2
SRH       8012.820 Hz
FIDRES    0.244592 Hz
AQ        4.2894465 sec
RG        210.59
DK        60.400 usec
DE        10.00 usec
TE        298.0 K
DL        1.00000000 sec
ZD0       1
SFO1      400.1324708 MHz
NUC1      1H
P0        4.33 usec
P1        13.00 usec
PTX1      16.00000000 W

F2 - Processing parameters
SI        65536
SF        400.1300000 MHz
WDW       EM
SSB       0
LB        2.00 Hz
GB        0
PC        1.00
  
```
